# Supplementary material for: Ribosomal protein mutation suppresses gonadal leader cell migration defects in mig- 17/ADAMTS mutants in Caenorhabditis elegans
Source: Research Square preprint supplement (doi:10.21203/rs.3.rs-5352169/v1), 2024-11-18

**Supplementary Information**

**Figure S1** Quantitative analysis of gonadal defects for *gcn-1; mig-17*, *pek-1; mig-17* and *rict-1; mig-17*. *gcn-1*, *pek-1* and *rict-1* failed to suppress *mig-17.* *mig-17(k174)* was marked with *unc-42(e270),* which weakens *mig-17* phenotype. N=60 for each strain. P-values for Fisher’s exact test against *mig-17(k174)* are indicated: NS, not significant.

**Figure S2** Quantification of FBL-1C expression and localization. (A) Western blot analysis of FBL-1C-Venus using anti-GFP. Protein samples of 20 and 40 μg were loaded for each strain. FBL-1C-Venus and anti-α-tubulin (loading control) protein levels on western blots were measured using ImageJ software, and the intensity ratios (FBL-1C-Venus/α-tubulin) are indicated below the respective lanes. Original blots are presented in Supplementary Figure S3. (B, C) Expression of mNG-FBL-1. (B) Representative confocal image of the pharynx of a wild-type young adult hermaphrodite expressing mNG-FBL-1. Anterior is to the left. Scale bar, 10 μm. Lines 1 to 3 and BG (background), corresponding to pharyngeal basement regions for the metacorpus, isthmus, terminal bulb, and background, were drawn using Fiji software. The fluorescence at the pharyngeal tip corresponds to FBL-1D-Venus expression. (C) Box-and-whisker plot of the average fluorescence intensities of regions 1 to 3. P-values for Student’s t-test are indicated: NS, not significant. N = 15 for each strain.

**Figure S3** Original Western blots related to Figure 7 and Supplementary figure S2. Each dotted line represents a region shown in the figure.


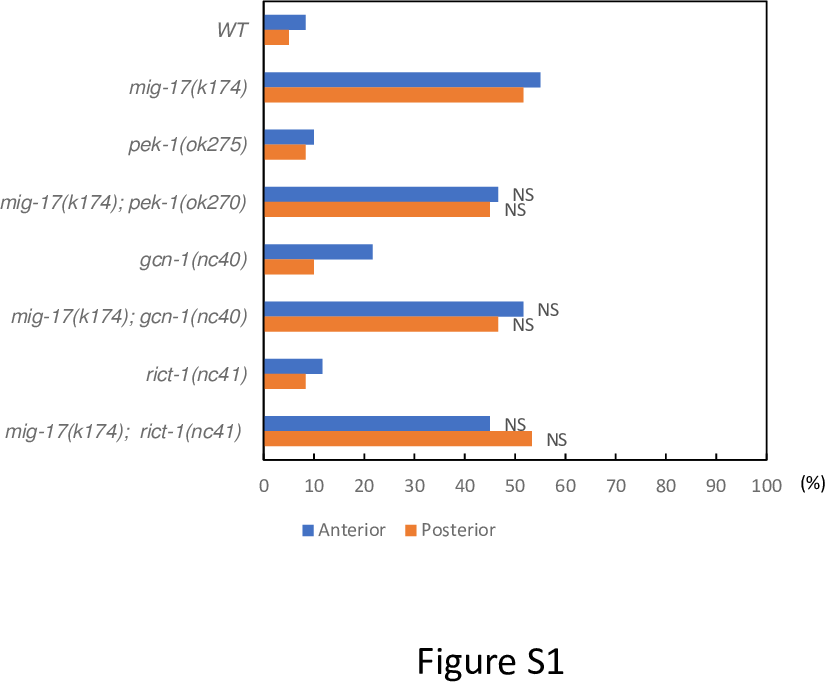


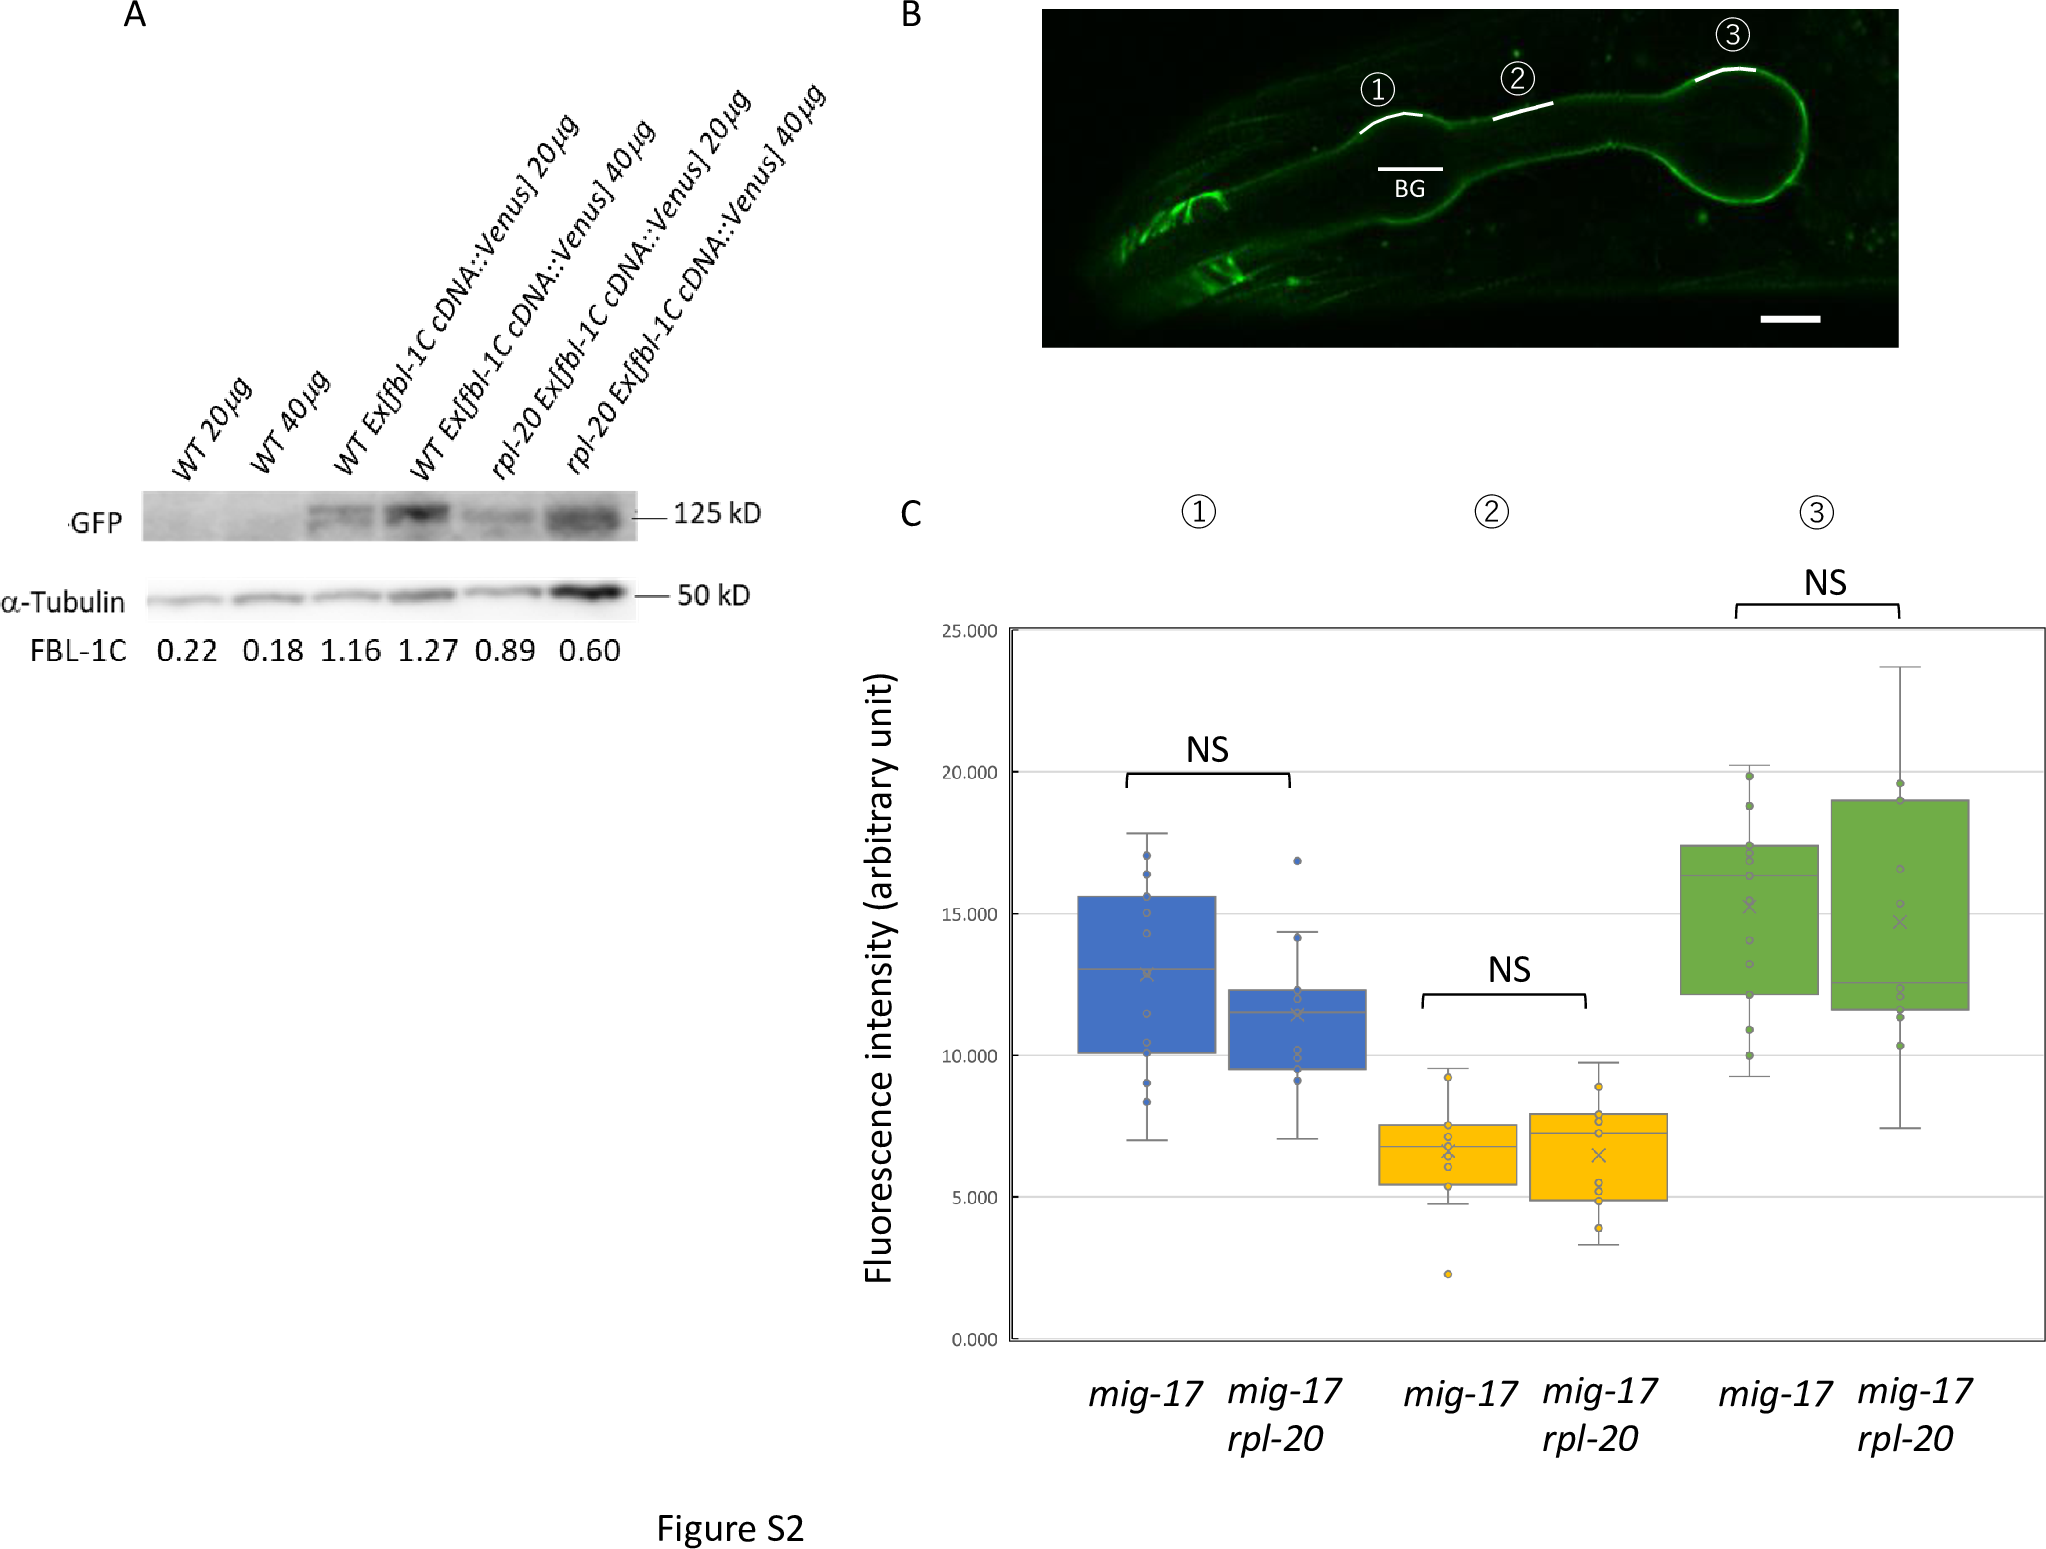


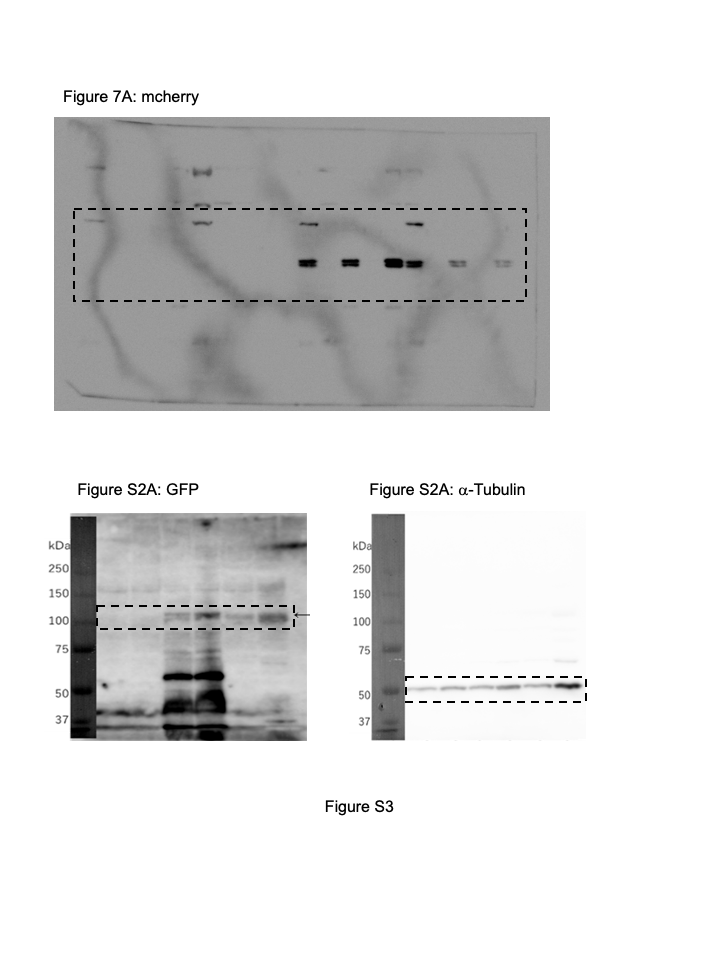

Supplement: Supplementary file 1 [file afef4eb136f8e554c7aa0057.docx]
